# 1 The Use of Carotid Web Angioarchitecture in Stratification of Stroke Risk

2

3 Authors: Bruck Negash, BS<sup>1</sup>; Daniel D. Wiggan, BS<sup>1</sup>; Eric A. Grin, BS<sup>1</sup>; Karl L. Sangwon, BS<sup>1</sup>;  
4 Charlotte Chung, MD, PhD<sup>1</sup>; Eleanor Gutstadt<sup>1</sup>; Vera Sharashidze, MD<sup>1,2,3</sup>; Eytan Raz MD,  
5 PhD<sup>1,2</sup>; Maksim Shapiro, MD<sup>1,2,3</sup>; Koto Ishida, MD<sup>2</sup>; Jose L Torres, MD<sup>2</sup>; Cen Zhang, MD<sup>2</sup>;  
6 Michelle A Nakatsuka, BS<sup>1</sup>; Sara K Rostanski, MD<sup>2</sup>; Melissa J. Rethana, MD<sup>2</sup>; Alexandra  
7 Kvernland, MD<sup>2</sup>; Matthew Sanger, MD<sup>2</sup>; Kaitlyn Lillemoe, MD<sup>2</sup>; Alexander Allen, MD; Sean  
8 Kelly, MD<sup>2</sup>; Jacob Baranoski, MD<sup>1</sup>; Caleb Rutledge, MD<sup>1</sup>; Howard A. Riina, MD<sup>1</sup>; Peter Kim  
9 Nelson, MD<sup>1</sup>; Erez Nossek, MD<sup>1</sup>

10

## 11 Affiliations:

12 Department of Neurosurgery, NYU Grossman School of Medicine, New York, New York,  
13 USA

14 Department of Neurology, NYU Grossman School of Medicine, New York, New York, USA

15 Department of Radiology, NYU Grossman School of Medicine, New York, New York, USA

16

## 17 Abstract

18 **Objective:** To validate the carotid web (CW) risk stratification assessment described in our  
19 previous work with a larger cohort of patients with incidentally found asymptomatic  
20 CWs.

21 **Methods:** A retrospective analysis of our electronic medical record database identified all  
22 patients with a diagnosis of CW from 2017-2024 at our institution. We included  
23 symptomatic patients and those with asymptomatic carotid webs, meaning patients with  
24 incidentally found webs and no history of stroke or transient ischemic attack (TIA). Patient  
25 charts were reviewed for demographics, imaging, comorbidities, hospital course, and

26 incidence of stroke after diagnosis of an asymptomatic carotid web. All angles were  
27 measured as described in our previous work on a sagittal reconstruction of CTA imaging of  
28 the neck in which the common carotid artery (CCA), external carotid artery (ECA), and ICA  
29 could be well visualized, along with the CW itself. A standard logistic regression was  
30 performed to evaluate the association between the number of high-risk angles and stroke  
31 risk.

32

33 **Results:** 26 asymptomatic and nine symptomatic patients were identified. Patients were  
34 categorized as having 0, 1, or 2+ high-risk angle values. Patients with more high-risk angles  
35 had a markedly higher risk of stroke (OR = 5.91, 95% CI: [4.25, 8.24]). The probability of  
36 stroke increased with the number of high-risk angles: patients with 2+ high-risk angles  
37 (83.4%) had the highest stroke probability compared to those with 0 (2.8%) or 1 (27.7%)  
38 high-risk angles. In the asymptomatic cohort, mean angles all fell below the high-risk  
39 threshold values. In the symptomatic cohort, mean angles were above the high-risk  
40 threshold values, whereas the mean CPT (53.6°) angle fell below the cut-off value for  
41 designation as a high-risk angle.

42 **Conclusions:** Given the successful stratification of CWs into high and low-risk groups in  
43 this study, the utilization of geometric CW parameters may play a crucial role in  
44 improvement of patient selection for intervention in patients with an incidental diagnosis of  
45 CW.

46 MeSH Keywords: Stroke, Neuroimaging, Risk assessment

47

48 **Introduction:**

49 Carotid webs (CWs) are endoluminal bands of fibrous tissue extending from the posterior  
50 margin of the internal carotid artery (ICA) just distal to the carotid bulb.<sup>1</sup> Notably, CWs have  
51 been implicated as a cause of thromboembolic stroke, particularly in younger patients  
52 lacking other identifiable stroke risk factors.<sup>2,3</sup> While CWs themselves are rare, with a

53 reported prevalence of 2.3%, as awareness of CWs rises, increasing numbers of patients  
54 are being incidentally diagnosed.<sup>4</sup> This number will likely continue to rise considering the  
55 steadily increasing rate of medical imaging in healthcare.<sup>5</sup>

56 CWs can be categorized as symptomatic, causing a stroke or transient ischemic attack  
57 (TIA), or asymptomatic, presenting as an incidental finding.<sup>6</sup> To date, no prior research has  
58 determined whether a pathophysiological or structural difference exists between  
59 symptomatic and asymptomatic webs. In this manner, physicians currently have no way to  
60 assess whether a patient with an incidentally discovered CW is at risk of having a future  
61 stroke. Given the relatively high incidence of incidentally discovered asymptomatic ACWs,  
62 determining future stroke in patients with asymptomatic CWs would be of great aid to  
63 clinicians in determining the optimal course of management.

64 Our previous work proposed a new method by which to stratify stroke risk in CW patients  
65 according to anatomic data on the ICA, common carotid artery (CCA), and CW (Table 1).<sup>7</sup>  
66 This is accomplished by considering the web's key structural features and relationship to  
67 the carotid bifurcation, a collection of findings we name the carotid web angioarchitecture.  
68 In this current study, we aimed to validate this CW angioarchitecture-based risk  
69 stratification assessment within a new population of patients including a larger cohort with  
70 incidentally found, asymptomatic CWs.

71

## 72 **Methods:**

73 A single-institution study was performed. Patient consent was waived per the institutional  
74 review board (IRB s22-00111). Our electronic medical record database was queried for all  
75 imaging impressions containing the word "carotid web" over the seven-year period from  
76 2017-2024. Patients were identified to have CWs based on classic findings on CTA,  
77 including a radiographic "shelf-like" filling defect at the posterior wall of the proximal  
78 internal carotid artery (ICA) and description by the diagnosing neuroradiologist.

79 Patient files were then further reviewed for ischemic signs and symptoms. Symptomatic  
80 patients were defined as patients with a diagnosis of CW and a history of ipsilateral stroke  
81 or TIA. Diagnoses of stroke or TIA were based on neurologic symptoms, neuroimaging using  
82 CT or MRI, and vessel imaging using CTA or angiography. All diagnoses of stroke or TIA were  
83 made by a board-certified vascular neurologist. Further, all strokes occurred ipsilateral to  
84 the identified carotid web, and in each case, the carotid web was determined by the  
85 vascular neurology team to be the most likely cause of stroke after a thorough assessment  
86 ruling out other causes of ischemic events. Asymptomatic patients were defined as  
87 patients with CWs on CTA imaging who had no history of stroke or TIA. These patients were  
88 incidentally found to have CWs while undergoing imaging for unrelated conditions or  
89 circumstances.

90 Patient charts were then reviewed for demographics, imaging findings, clinical course, and  
91 outcomes after CW diagnosis. Angioarchitectural parameters, including the ICA – web  
92 pouch angle (IWP), CCA -- web pouch angle (CWP), ICA -- pouch tip angle (IPT), and CCA --  
93 pouch tip angle (CPT), were measured as described in our previous work and serve as  
94 proxies for flow dynamics around the CW (Figure 1).<sup>7</sup> These features were measured  
95 consistently by the same two investigators. All angles were measured on a sagittal  
96 reconstruction of CTA imaging of the neck in which the CCA, external carotid artery (ECA),  
97 and ICA could be well visualized, along with the CW itself.

98 For statistical analysis, each patient, and thus each CW, was then categorized as  
99 having either 0, 1, or 2+ high-risk angle values, meaning values above the predetermined  
100 thresholds for each parameter. We performed a standard logistic regression to evaluate the  
101 association between the number of high-risk angles and stroke risk. The number of high-  
102 risk angles was grouped into three categories: 0, 1, and 2+. The outcome was binary (stroke  
103 occurrence), where 1 represented stroke and 0 represented no stroke. The predictor  
104 variable was standardized prior to modeling to improve convergence. Odds ratios (OR) and  
105 95% confidence intervals (CI) were calculated to quantify the relationship between high-  
106 risk angles and stroke risk. The predicted probability of stroke was plotted for each  
107 group. STROBE reporting guidelines were adhered to throughout our study.<sup>8</sup>

108

109 **Results:**

110 Twenty six asymptomatic and nine symptomatic patients with a mean age at diagnosis of  
111 57.4 years (range 28 - 80 years) and 60.8 years (range 32 - 89 years) respectively. No  
112 significant differences in age, sex, history of hypertension, history of hyperlipidemia or  
113 smoking status were observed between the two cohorts (Table 2).

114 Logistic regression revealed a significant positive association between the number of high-  
115 risk angles and stroke risk (Figure 2). Patients with more high-risk angles had a markedly  
116 higher risk of stroke, with each additional high-risk angle associated with a significant  
117 increase in the odds of stroke (OR = 5.91, 95% CI: [4.25, 8.24]).

118 The predicted probability of stroke increased progressively with the number of high-risk  
119 angles, with patients in the 2+ group showing the highest predicted stroke probability  
120 compared to those with 0 or 1 high-risk angles. Specifically, patients without any high-risk  
121 angles had a stroke probability of only 2.8%. This increased to 27.7% for one high risk angle  
122 and then markedly increased to 83.4% for two or more high risk angles. The number of  
123 patients in each cohort and the concordance of their angle values with corresponding  
124 cutoffs are shown in Table 3. The positive and negative predictive values for each  
125 angioarchitectural parameter were calculated and are included in Table 4. No patients in  
126 the asymptomatic group had suffered a stroke at a mean follow-up of 47.2 months (range  
127 24 - 77 months).

128 In the asymptomatic cohort, mean IWP (90.5°), CWP (40.8°), IPT (78.1°), and CPT (59.1°)  
129 angles all fell below the high-risk threshold values determined from our previous work. In  
130 the symptomatic cohort, mean IWP (96.9°), CWP (56.2°), and IPT (97.1°) angles were above  
131 the high-risk threshold values, whereas the mean CPT (53.6°) angle fell below the cut-off  
132 value of 89.4° for designation as a high-risk angle.

133 **Discussion:**

134 Our previous work used eleven symptomatic and eleven asymptomatic patients, to  
135 determine several parameters of CW angioarchitecture predictive of higher risk for  
136 experiencing future stroke. In this study, we validate this model within a significantly larger  
137 cohort of asymptomatic patients with incidentally discovered CWs and a fresh  
138 symptomatic cohort.

139 Our study found that within the group of asymptomatic patients with incidentally  
140 discovered CWs, the mean values for all four angles fell below the predetermined  
141 threshold values. Our results in this study, and in our previous work, have suggested that  
142 CPT and IWP angles are particularly useful for delineating high versus low stroke risk. Thus,  
143 these values may merit particular attention. However, while the mean angle values of the  
144 asymptomatic cohort fell below each cutoff value, outlier angle values above the threshold  
145 value were regularly seen. Similarly, symptomatic patients often have individual angle  
146 measurements that fall within the low stroke risk category. Thus, angioarchitectural  
147 parameters are more informative when considered as a group rather than when focusing on  
148 the value of a singular parameter.

149 For instance, if two or more of the four angle parameters for a given patient fall above their  
150 respective cutoff values, this is much more likely to indicate a significant risk of stroke than  
151 does having only a single high-risk value. In this manner, it may be more useful to consider  
152 how many angle values out of the four total fall above or below the threshold. Patients may  
153 be stratified into 0, 1, or 2+ high-risk angle categories, allowing for more distinct risk  
154 assignment. However, these values must also be interpreted within the unique clinical  
155 context of each patient, and the clinician must use their best judgment in management.

156 CWs remain an underrecognized etiology of ischemic stroke.<sup>9</sup> This is in part due to their  
157 rarity, considering they are present in only 1.0-1.2% of all stroke patients.<sup>2</sup> Additionally, in  
158 contrast to more common stroke etiologies like large atherosclerotic plaques, CWs are not  
159 traditionally associated with significant carotid stenosis and appear much more subtly on  
160 vascular imaging.<sup>10</sup> Nonetheless, they have been demonstrated to significantly disrupt  
161 blood flow and can serve as a nidus for thrombus formation.<sup>11</sup> For this reason, CWs have

162 been said to increase the risk of stroke by a factor of 8.<sup>12</sup> However, no previous studies have  
163 differentiated between symptomatic and asymptomatic CWs and their relative stroke  
164 risks.

165 One significant challenge in research investigating CW stroke risk is that the cause of CWs  
166 remains unknown. Thus, it is unclear if the difference between symptomatic and  
167 asymptomatic CWs is one solely of structure, as in the case of different geometric features  
168 (“angioarchitecture”), or if other factors, such as accumulated time with a CW, may also  
169 contribute to stroke. This is especially difficult considering it is undetermined whether CWs  
170 are present from birth or if they develop later in life.

171 Regardless, the differentiation between symptomatic and asymptomatic webs is crucial,  
172 as symptomaticity affects the next steps in clinical management and the determination of  
173 whether intervention is indicated. In the case of symptomatic webs, current evidence  
174 suggests that intervention is superior to conservative management, with one systematic  
175 review of 158 patients with CWs demonstrating a 56% recurrent stroke rate in patients  
176 receiving purely medical management versus a 0% recurrent stroke rate in those receiving  
177 surgical intervention.<sup>13</sup>

178 Carotid endarterectomy (CEA) is one intervention that may reduce the risk of stroke  
179 recurrence by resecting the carotid web, thereby clearing the ICA lumen.<sup>14,15</sup> Therefore,  
180 continuing to develop and validate a model to grade stroke risk of incidentally discovered  
181 carotid webs may help identify high-risk patients who would benefit from intervention,  
182 such as CEA or carotid artery stenting (CAS), as opposed to conservative management.  
183 Similarly, patients with incidentally determined webs determined to have a low stroke risk  
184 may then avoid the morbidity associated with unnecessary surgery.

185 While this study’s results are encouraging and further validate this model of risk  
186 assessment, there are several limitations. First, all angle measurements are measured by  
187 hand, which makes this method prone to error from inter-user variability. While two  
188 investigators made all measurements in this study, there may still be some variability  
189 between them. A potential solution to this problem is the development of a machine

190 learning image segmentation program that can measure these angles on CTA imaging in a  
191 consistent, standardized manner. This would also allow this method to be consistently  
192 applied by different providers and across different institutions.

193 This study is also limited by its small sample size; this model of risk assessment will  
194 require further validation and refinement within larger populations. Additionally, while our  
195 angioarchitectural parameters are meant to serve as proxies for flow dynamics around the  
196 CW, quantitative research is needed to determine if there are measurable flow dynamic  
197 differences between symptomatic and asymptomatic webs. Lastly, while the  
198 asymptomatic patients experienced no cerebrovascular events throughout their clinical  
199 follow-up, this period ranged from two to just over six years, and follow-up over a longer  
200 period may be necessary to definitively categorize patients as asymptomatic.

201

## 202 **Conclusions:**

203 Carotid webs with more high-risk angioarchitectural parameters on CTA, as defined by our  
204 previous work, can be used to identify a heightened risk for stroke. These angle values are  
205 most meaningful when assessed collectively for a patient. Having two or more high-risk  
206 angles is associated with a high probability of stroke. The carotid web stroke risk  
207 assessment strategy described in our previous work accurately categorized all  
208 asymptomatic patients with incidentally discovered carotid webs as low stroke risk across  
209 all four previously described parameters of carotid web angioarchitecture. Assessing  
210 geometrical carotid web parameters may guide risk stratification of patients  
211 with incidentally discovered webs, thereby improving the fidelity of surgical patient  
212 selection.

213

214 **Acknowledgments:** The authors wish to thank Karl L. Sangwon for the illustrations  
215 included in this article.



216 **Data Statement:** The data are not publicly available to preserve patient confidentiality and  
217 due to institutional data sharing policies. However, the data are available from the  
218 corresponding author on reasonable request and with appropriate institutional  
219 approvals.

220 **Disclosures:** No relevant financial disclosures.

221

222 References:

- 223 1. Esparza R, Schneider JR, Groy BM, Nossek E. How I do it: endarterectomy for  
224 carotid web. *Acta Neurochir (Wien)*. 2021;163(6):1763-1766. doi:10.1007/s00701-  
225 021-04841-z
- 226 2. [Choi PMC, Singh D, Trivedi A, et al. Carotid Webs and Recurrent Ischemic Strokes in  
227 the Era of CT Angiography. \*AJNR Am J Neuroradiol\*. 2015;36\(11\):2134-2139.  
228 doi:10.3174/ajnr.A4431](#)
- 229 3. Wojcik K, Milburn J, Vidal G, Steven A. Carotid Webs: Radiographic Appearance and  
230 Significance. *Ochsner J*. 2018;18(2):115-120. doi:10.31486/toj.18.0001
- 231 4. Mei J, Chen D, Esenwa C, et al. Carotid web prevalence in a large hospital-based  
232 cohort and its association with ischemic stroke. *Clin Anat N Y N*. 2021;34(6):867-  
233 871. doi:10.1002/ca.23735
- 234 5. Smith-Bindman R, Kwan ML, Marlow EC, et al. Trends in Use of Medical Imaging in  
235 US Health Care Systems and in Ontario, Canada, 2000-2016. *JAMA*.  
236 2019;322(9):843-856. doi:10.1001/jama.2019.11456
- 237 6. Yang T, Yoshida K, Maki T, et al. Prevalence and site of predilection of carotid webs  
238 focusing on symptomatic and asymptomatic Japanese patients. *J Neurosurg*.  
239 2021;135(5):1370-1376. Published 2021 Mar 5. doi:10.3171/2020.8.JNS201727

- 240 7. [von Oiste GG, Sangwon KL, Chung C, et al. Use of Carotid Web Angioarchitecture for](#)  
241 [Stroke Risk Assessment. \*World Neurosurg.\* 2024;182:e245-e252.](#)  
242 [doi:10.1016/j.wneu.2023.11.091](#)
- 243 8. Vandembroucke JP, von Elm E, Altman DG, et al. Strengthening the Reporting of  
244 Observational Studies in Epidemiology (STROBE): explanation and elaboration.  
245 *Epidemiology.* 2007;18(6):805-835. doi:10.1097/EDE.0b013e3181577511.
- 246 9. Mac Grory B, Nossek E, Reznik ME, et al. Ipsilateral internal carotid artery web and  
247 acute ischemic stroke: A cohort study, systematic review and meta-analysis. *PLoS*  
248 *One.* 2021;16(9):e0257697. Published 2021 Sep 17.  
249 doi:10.1371/journal.pone.0257697
- 250 10. Park CC, El Sayed R, Risk BB, et al. Carotid webs produce greater hemodynamic  
251 disturbances than atherosclerotic disease: a DSA time-density curve study. *J*  
252 *Neurointerv Surg.* 2022;14(7):729-733. doi:10.1136/neurintsurg-2021-017588
- 253 11. Mac Grory B, Emmer BJ, Roosendaal SD, Zagzag D, Yaghi S, Nossek E. Carotid web:  
254 an occult mechanism of embolic stroke. *J Neurol Neurosurg Psychiatry.*  
255 2020;91(12):1283-1289. doi:10.1136/jnnp-2020-323938
- 256 12. Coutinho JM, Derkatch S, Potvin AR, et al. Carotid artery web and ischemic stroke: A  
257 case-control study [published correction appears in *Neurology.* 2017 Aug  
258 1;89(5):521. doi: 10.1212/WNL.0000000000004167]. *Neurology.* 2017;88(1):65-69.  
259 doi:10.1212/WNL.0000000000003464
- 260 13. Zhang AJ, Dhruv P, Choi P, et al. A Systematic Literature Review of Patients With  
261 Carotid Web and Acute Ischemic Stroke. *Stroke.* 2018;49(12):2872-2876.  
262 doi:10.1161/STROKEAHA.118.021907
- 263 14. Haynes J, Raz E, Tanweer O, et al. Endarterectomy for symptomatic internal carotid  
264 artery web. *J Neurosurg.* 2020;135(1):1-8. Published 2020 Aug 28.  
265 doi:10.3171/2020.5.JNS201107

266 15. Brinster CJ, O’Leary J, Hayson A, et al. Symptomatic carotid webs require aggressive  
267 intervention. *J Vasc Surg.* 2024;79(1):62-70. doi:10.1016/j.jvs.2023.09.002

268

269

270

271

272

273

274

275

276

277

278

279

280

281

282

283

284

285

286

287

288 Table 1. Angioarchitectural parameters and risk thresholds.

| Angle | Angle Description                                                                            | Risk Threshold    |
|-------|----------------------------------------------------------------------------------------------|-------------------|
| IWP   | Angle between the Superior Pouch-Wall line and the Longitudinal Internal Carotid Artery line | $\geq 92.4^\circ$ |
| CWP   | Angle between the Superior Pouch-Wall line and the Longitudinal Common Carotid Artery line   | $\geq 41.7^\circ$ |
| IPT   | Angle between the Pouch-Bifurcation line and the Longitudinal Internal Carotid Artery line   | $\geq 85.7^\circ$ |
| CPT   | Angle between the Pouch-Bifurcation line and the Longitudinal Common Carotid Artery line     | $\geq 89.4^\circ$ |

289

290

291

292 Table 2. Demographics of patient population

|                 | Symptomatic n (%) | Asymptomatic n (%) |
|-----------------|-------------------|--------------------|
| <hr/>           |                   |                    |
| Comorbidities   |                   |                    |
| Hypertension    | 9(75)             | 14(51)             |
| Hyperlipidemia  | 11(92)            | 12(44)             |
| Smoking History | 5(42)             | 13(48)             |
| <hr/>           |                   |                    |
| Race            |                   |                    |
| Black           | 2(17)             | 4(15)              |
| White           | 6(50)             | 15(56)             |
| Asian           | 3(25)             | 2(7)               |
| Hispanic        | 1(8)              | 1(4)               |
| Unknown         | 0(0)              | 5(18)              |
| <hr/>           |                   |                    |
| Sex             |                   |                    |
| Male            | 4(33)             | 12(44)             |
| Female          | 8(66)             | 15(56)             |

293

294

295

296

297

298

299

300

301 Table 3. Angle risk categorization for symptomatic and asymptomatic patients

| Angle | Symptomatic Cohort (n=9) |                 | Asymptomatic Cohort (n=26) |                 |
|-------|--------------------------|-----------------|----------------------------|-----------------|
|       | n, high risk (%)         | n, low risk (%) | n, high risk (%)           | n, low risk (%) |
| IPT   | 6 (66.7)                 | 3 (33.3)        | 2 (7.7)                    | 24 (92.3)       |
| CPT   | 0 (0.0)                  | 9 (100.0)       | 0 (0.0)                    | 26 (100.0)      |
| IWP   | 4 (44.4)                 | 5 (55.5)        | 5 (19.2)                   | 21 (80.1)       |
| CWP   | 5 (55.5)                 | 4 (44.4)        | 5 (19.2)                   | 21 (80.1)       |

Abbreviations: CPT, common carotid artery – pouch-tip; CWP, common carotid artery – web-pouch; IPT, internal carotid artery – pouch-tip; IWP, internal carotid artery – web pouch

302

303

304

305 Table 4. Positive and Negative Predictive Values of Angioarchitectural Parameters.

| Angle | PPV (%) | NPV (%) |
|-------|---------|---------|
| IPT   | 75.0    | 88.9    |
| CPT   | 0.0     | 74.2    |
| IWP   | 44.4    | 80.8    |
| CWP   | 50.0    | 84.0    |

---

Abbreviations: CPT, common carotid artery – pouch-tip; CWP, common carotid artery – web-pouch; IPT, internal carotid artery – pouch-tip; IWP, internal carotid artery – web pouch; NPV, negative predictive value; PPV, positive predictive value

---

Figure 1. Illustrations demonstrating the (A) ICA Web-Pouch (IWP) angle, CCA Web-Pouch (CWP) angle, (B) ICA Pouch-Tip (IPT) angle, and CCA Pouch-Tip (CPT) angle.

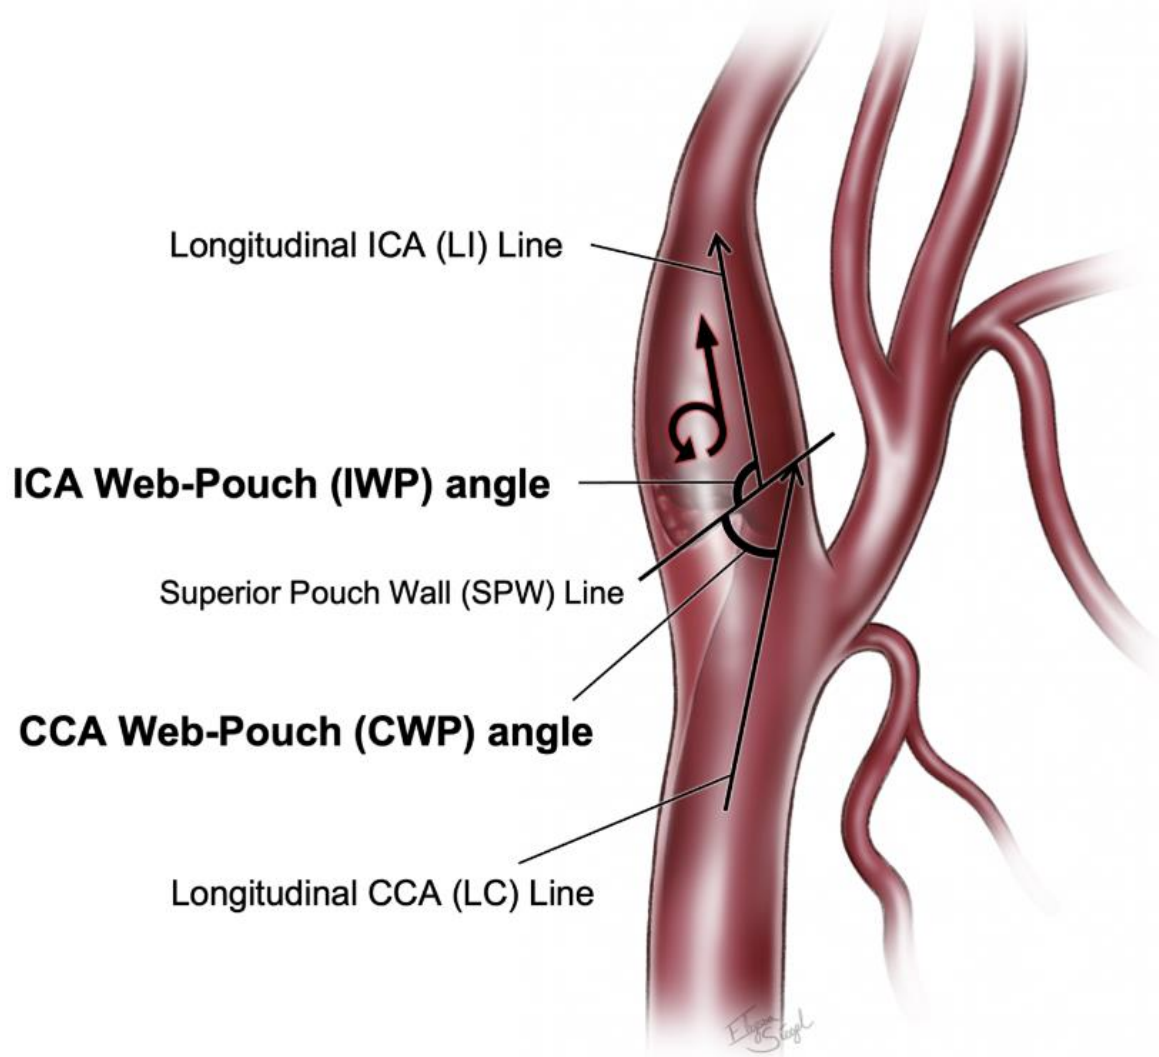



Figure 2. Stroke probability by the number of above-threshold angle values.

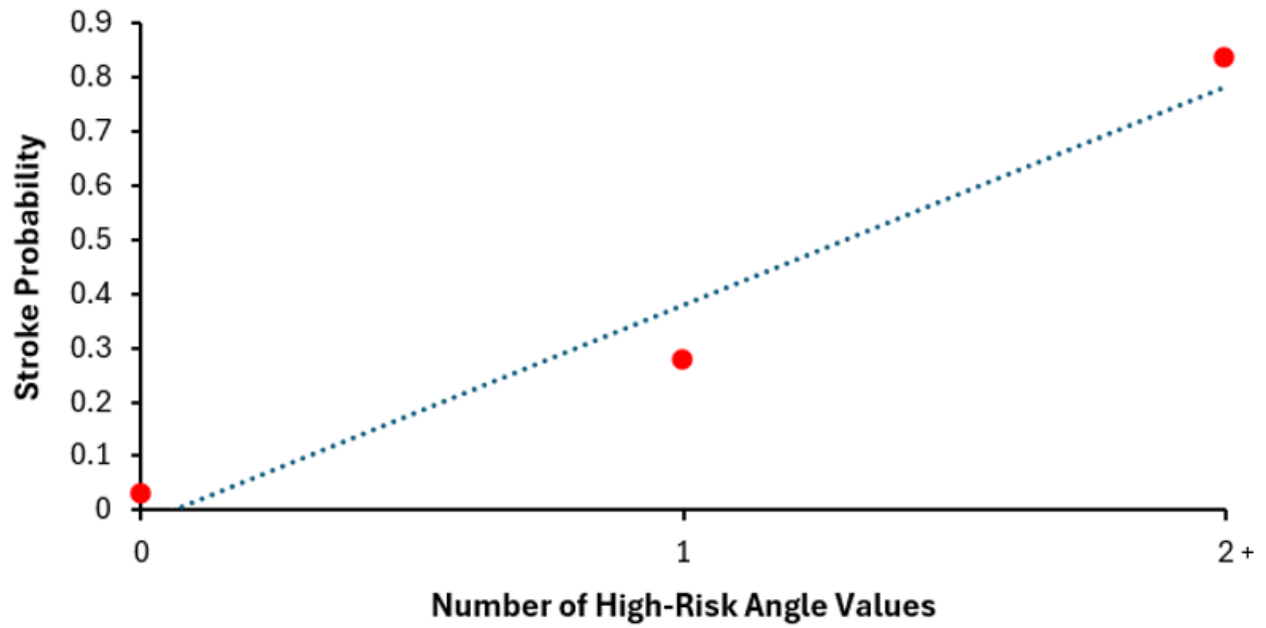

Source: https://medrxiv.org/content/10.1101/2024.11.07.24316945v1.full.pdf
